# Supplementary material for: Lotus japonicus Nuclear Factor YA1, a nodule emergence stage‐specific regulator of auxin signalling
Source: PubMed Central journal article supplement (PMC7984406; doi:10.1111/nph.16950), 2020-11-02
Supplement: NPH-229-1535-s001.pdf [file NPH-229-1535-s001.pdf]

## **New Phytologist Supporting Information**

Article title: *Lotus japonicus* Nuclear Factor YA1, a nodule emergence stage-specific regulator of auxin signalling.

Authors: Arina Shrestha, Sihui Zhong, Jasmine Therrien, Terry Huebert, Shusei Sato, Terry Mun, Stig U. Andersen, Jens Stougaard, Agnes Lepage, Andreas Niebel, Loretta Ross and Krzysztof Szczyglowski\*

Article acceptance date: 05 September 2020

The following Supporting Information is available for this article:

Fig. S1. *Lotus japonicus* STY proteins.

Fig. S2. The putative RING zinc-finger domain.

Fig. S3. Predicted IGGH domain.

Fig. S4. *Lotus japonicus* mutant *sty* alleles.

Fig. S5. *Lotus japonicus* single *sty* mutants have only very subtle symbiotic defects.

Fig. S6. Mutations at most *STY* loci affect non-symbiotic plant growth.

Fig. S7. Primary sequence conservation between predicted *Lotus japonicus* YUCCA proteins.

Fig. S8. Relationship tree between predicted *Lotus japonicus* and *Medicago truncatula* YUCCA proteins.

Fig S9. *Lotus japonicus* NF-YAs function partially redundantly

Table S1. Primers used in this study.

Table S2. Expression of four *Lotus japonicus* *STY* genes is significantly upregulated during early stages of symbiosis.

Table S3. Analysis of *Medicago truncatula* *STY* gene expression.

Table S4. List of *sty* alleles carrying a LORE1 insertion, as identified from the Lotus Base information portal (<https://lotus.au.dk/>).

Table S5. Segregation of the *proNF-YA1:STY3::SRDX* transgene in T1 populations, *STY3::SRDX5* and *STY3::SRDX6*, derived from two independent T0 plants.

Table S6. *YUCCA11* is regulated upon *Mesorhizobium loti* inoculation.

Table S7. A list of mutant *nf-ya* alleles used in this study.

Table S8. Levels of different *NF-YA* mRNAs in un-inoculated *L. japonicus* roots.

**Fig. S1:** *Lotus japonicus* STY proteins.

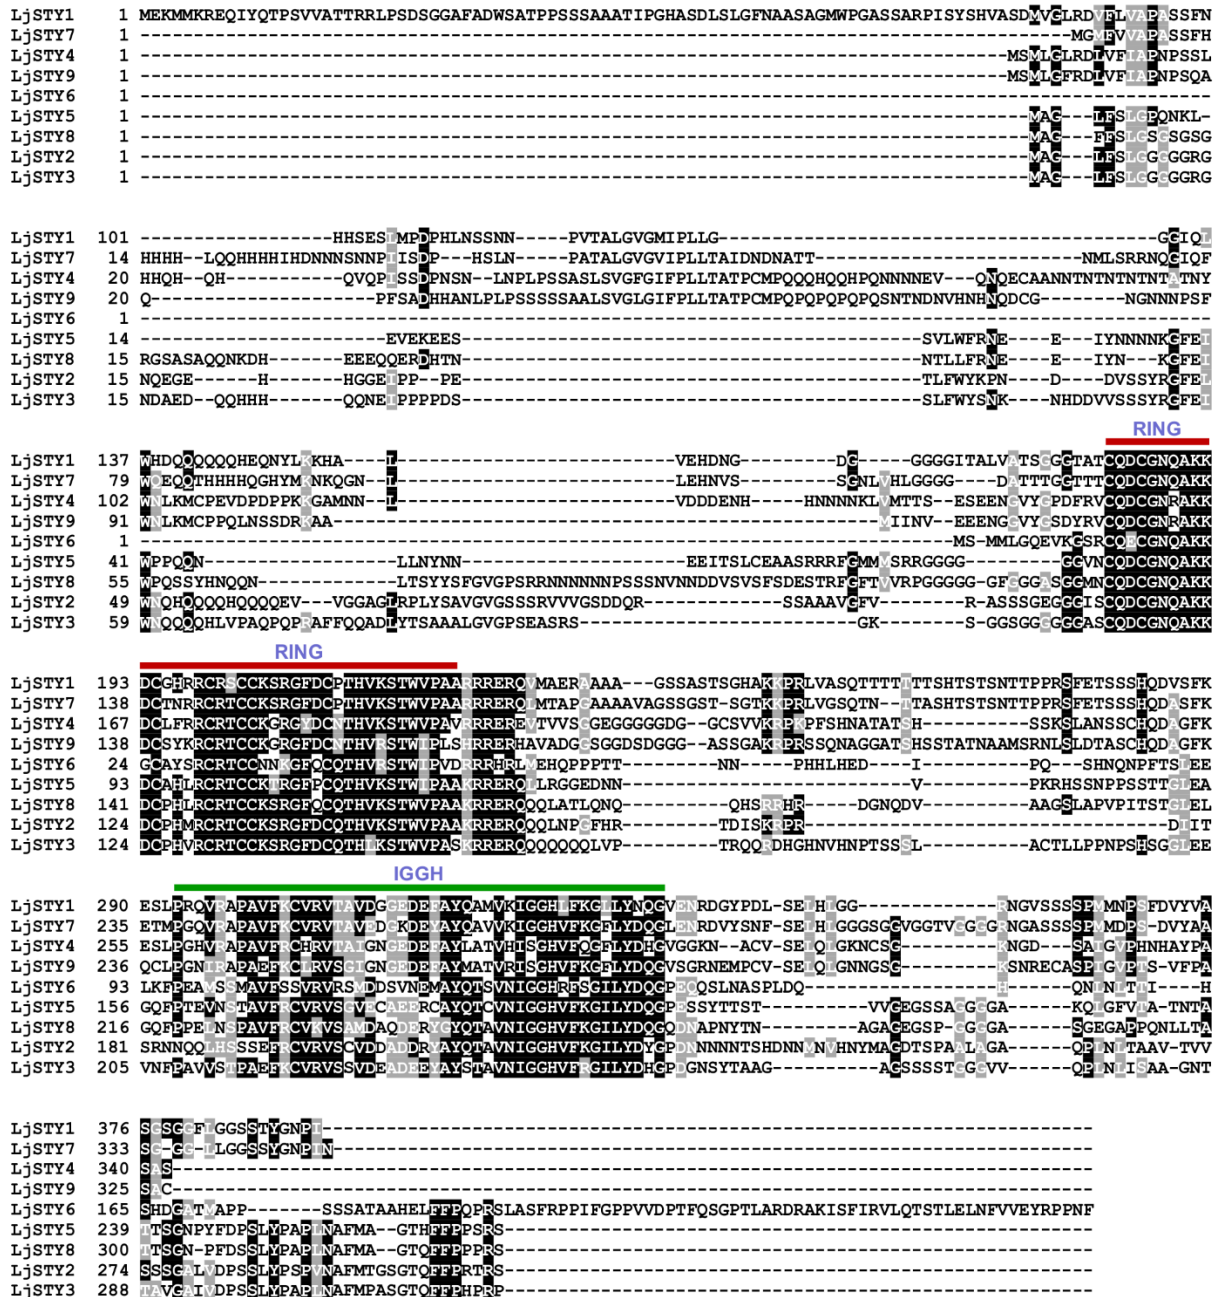

Nine predicted *L. japonicus* STY proteins were aligned with Clustal Omega using the default settings. The BoxShade Server version 3.21 was used to generate the final output. A threshold of  $\geq 50\%$  conservation was used. Black shading indicates identical residues, whereas gray indicates presence of conservative substitutions. The following accession numbers refer to the *L. japonicus* protein sequences used: (1) LjSTY1 (Lj6g3v0959410), LjSTY2 (Lj0g3v0059359),

LjSTY3 (Lj2g3v1728900), LjSTY4 (Lj3g3v0766120), LjSTY5 (Lj1g3v2140900), LjSTY6 (Lj3g3v3376040), LjSTY7 (Lj2g3v3044220), LjSTY8 (Lj5g3v0155490), and LjSTY9 (Lj0g3v0258549). The predicted SHI/STY proteins share two evolutionary conserved domains, RING zinc-finger and IGGH, which are highlighted by red and green lines, respectively.

Fig. S2. The putative RING zinc finger domain.

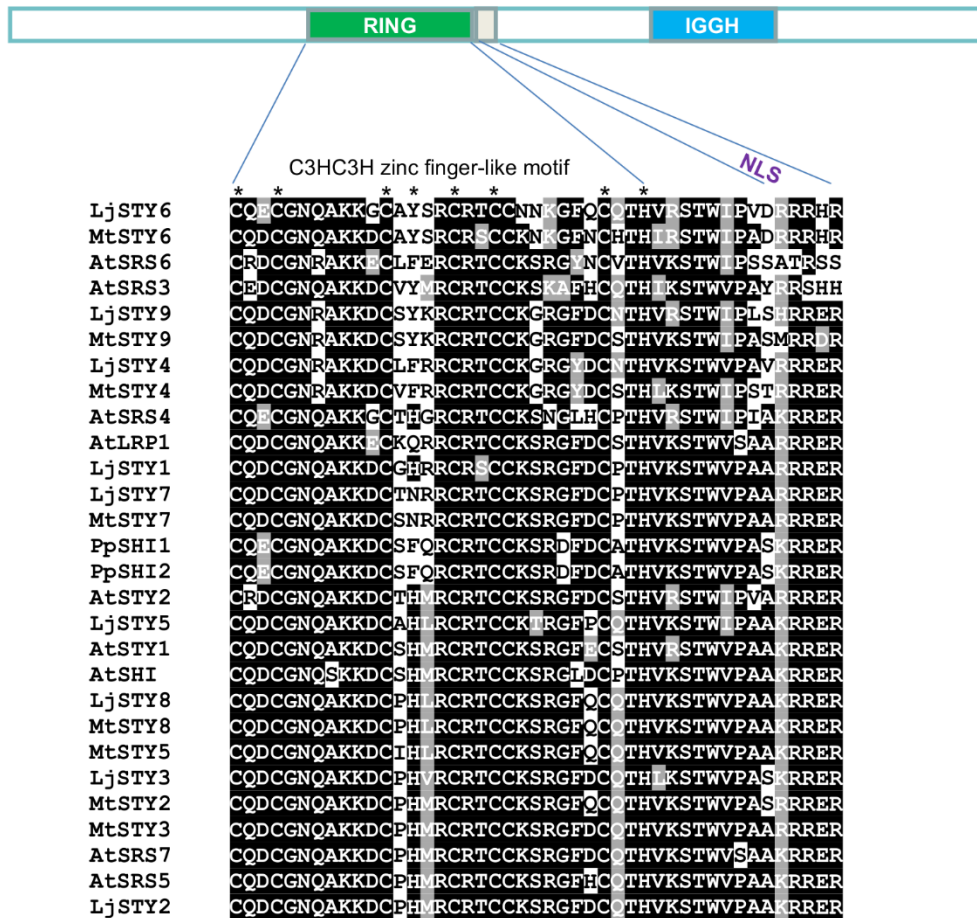

The putative RING zinc finger domain is highly conserved between *Lotus japonicus*, *Medicago truncatula*, *Arabidopsis thaliana* and *Physcomitrella patens* SHI/STY proteins. The domain sequence alignment was generated using the Clustal Omega program with default settings. The BoxShade Server version 3.21 was used to generate the final output. A threshold of  $\geq 50\%$  conservation was used. Black shading indicates identical residues, whereas gray indicates presence of conservative substitutions. The accession numbers for SHI/STY proteins are provided in the legend to Fig. 1. Accession numbers for SHI/STY proteins of *P. patens* are PpSHI1 (XP\_024359764) and PpSHI2 (XP\_024402501).

Fig. S3. Predicted IGGH domain.

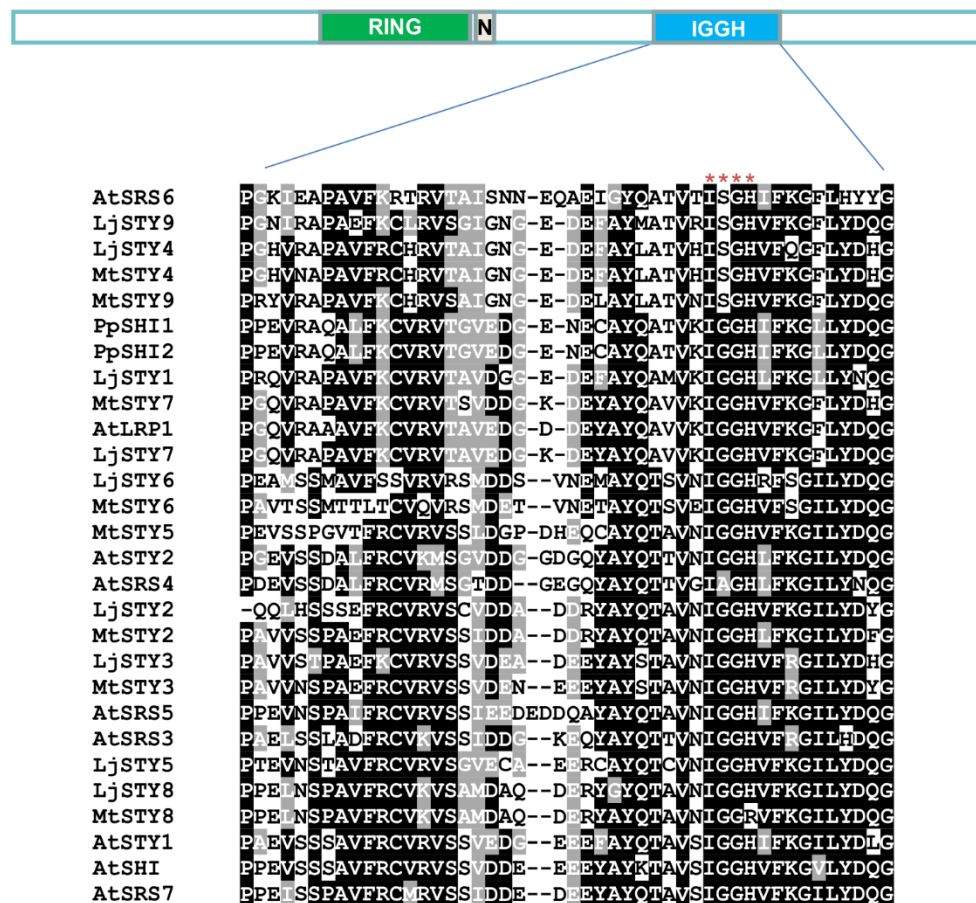

The IGGH domain is highly conserved between *Lotus japonicus*, *Medicago truncatula*, *Arabidopsis* and *Physcomitrella patens* SHI/STY proteins. The domain sequence alignment was generated using the Clustal Omega program with default settings. The BoxShade Server version 3.21 was used to generate the final output. A threshold of  $\geq 50\%$  conservation was used. Black shading indicates identical residues, whereas gray indicates presence of conservative substitutions.

**Fig. S4.** *Lotus japonicus* mutant *sty* alleles.

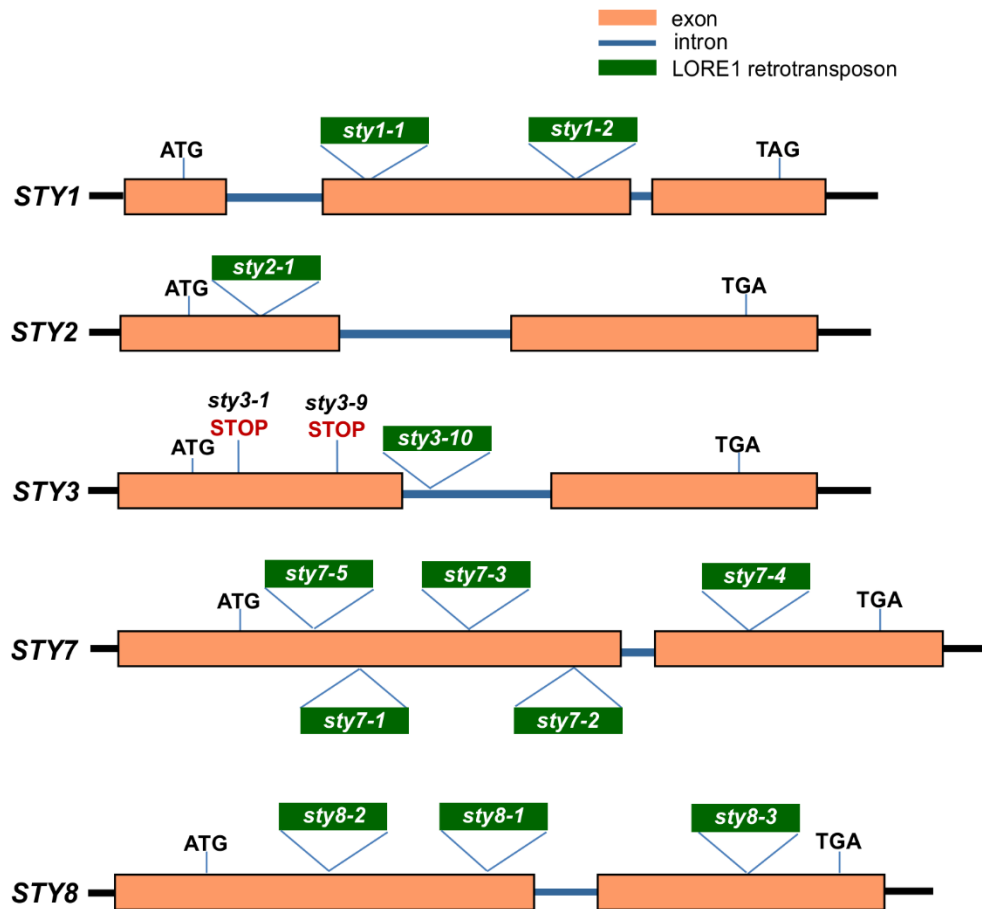

Schematic structures of five *Lotus japonicus* *STY* genes are shown with the approximate positions of LORE1 retrotransposon insertions (green boxes) or point mutations indicated. Names in the green boxes denote corresponding mutant alleles. Note that, for example, *sty1-1* and *sty1-2* represent two different *sty1* mutant alleles, each present in independent *L. japonicus* mutant lines. The same concept applies to all other *STY* loci. For *STY3*, two point mutations, *sty3-1* and *sty3-9*, which are predicted to generate premature stop codons (STOP), were identified using a TILLING approach (Perry et al., 2009). ATG and TGA correspond to predicted locations of translation initiation and termination signals, respectively.

**Fig. S5.** *Lotus japonicus* single *sty* mutants have only very subtle symbiotic defects.

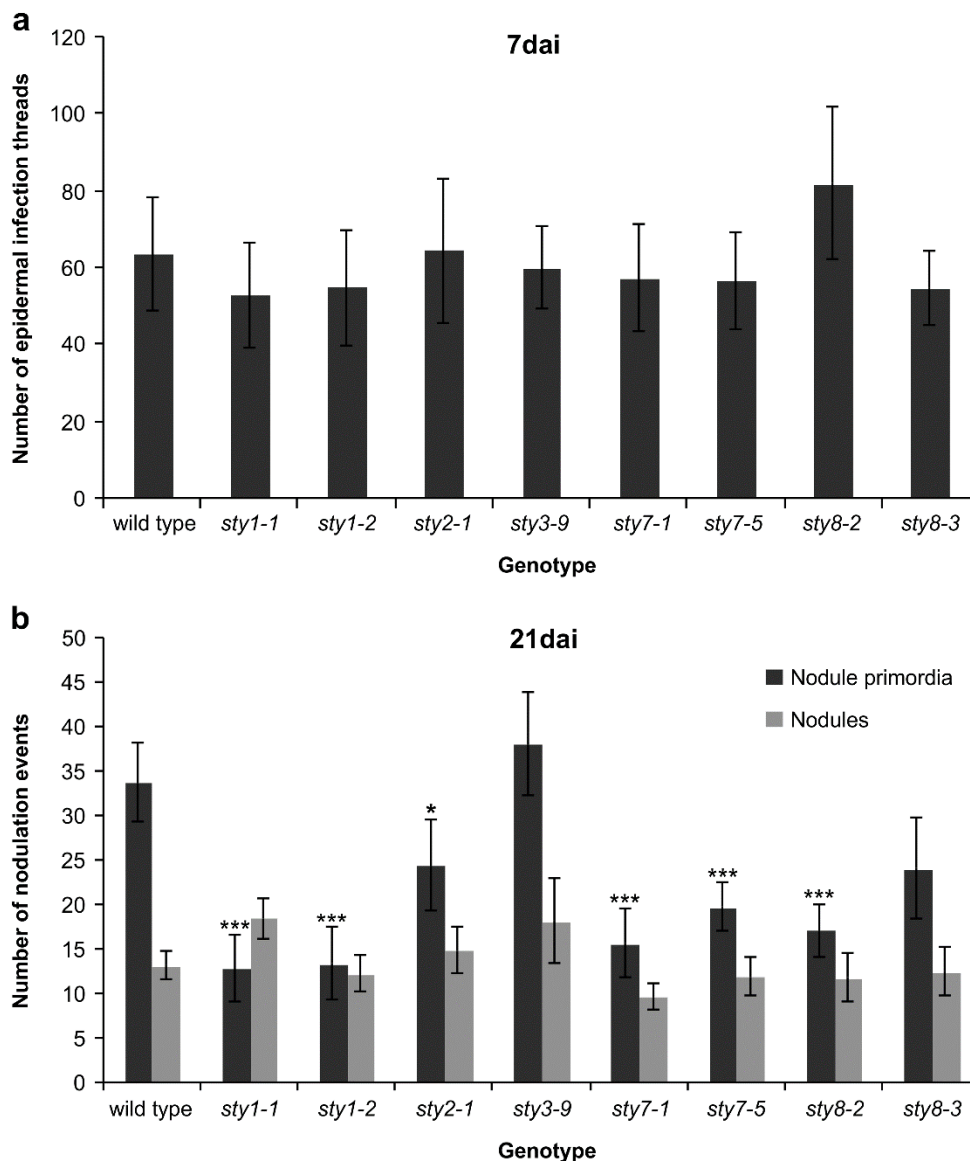

(a) Epidermal infection threads were scored in *L. japonicus* wild type and the selected *sty* mutants at 7 dai with *M. loti* strain NZP2235 carrying the *hemA:LacZ* reporter cassette (b) The same *sty* mutant lines were evaluated with regard to number of nodule primordia and nodules, which were scored 21 dai with *M. loti*. Note that where available, two independent mutant lines carrying different *sty* alleles (e.g. *sty1-1* and *sty1-2*) were used. Ten individuals were scored for each genotype and averages  $\pm$  95% confidence interval are given. Asterisks (\*) denote significant differences from wild type (Dunnett's test; \*P < 0.05; \*\*\*P < 0.001).



**Fig. S6.** Mutations at most *STY* loci affect non-symbiotic plant growth.

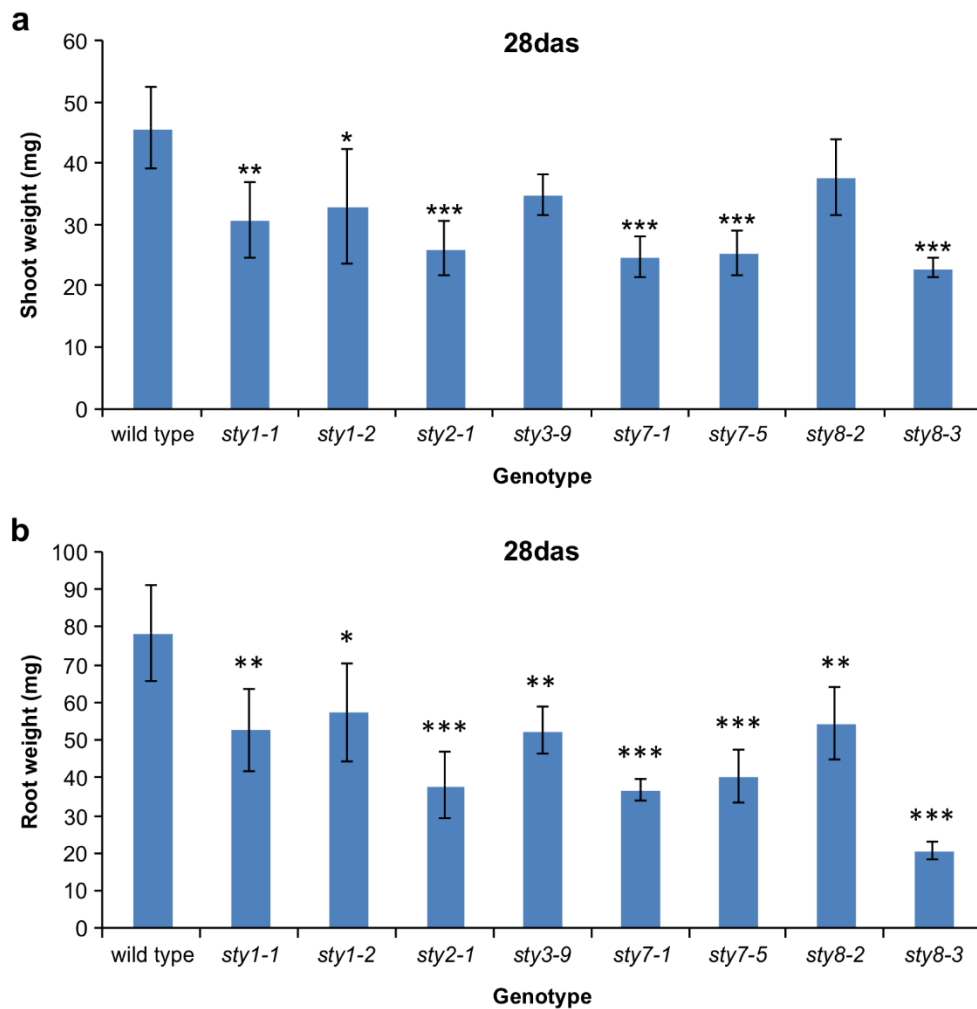

Plants were grown under sterile conditions, in the absence of *M. loti*, and the fresh shoot (**a**) and root weight (**b**) were measured 28 days after sowing (das). Ten plants were scored for each genotype. Averages  $\pm$  95% confidence intervals are given. Asterisk denotes a significant difference from the wild-type control (Dunnett's test; \* $P < 0.05$ ; \*\* $P < 0.01$ ; \*\*\*  $P < 0.01$ ).

Fig. S7. Primary sequence conservation between predicted *Lotus japonicus* YUCCA proteins.

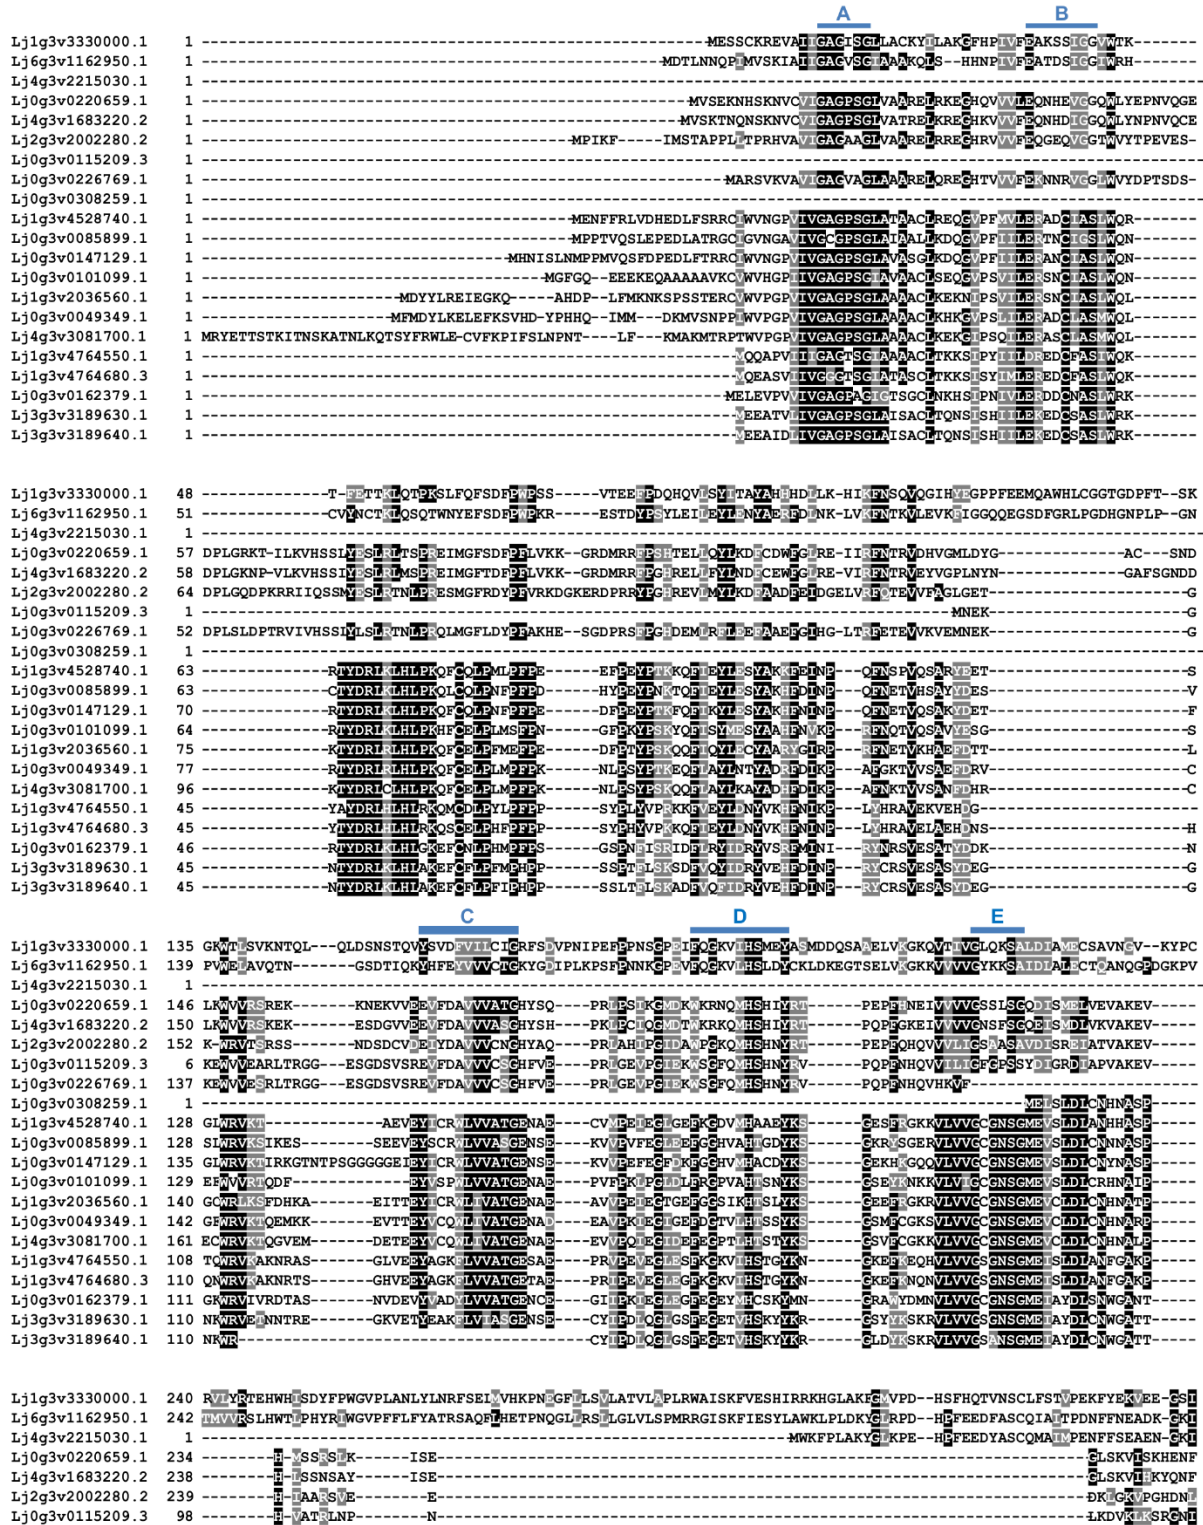

```

Lj0g3v0226769.1 -----
Lj0g3v0308259.1 15 KIVVRSVH--LPEE--FGKSTFELAV-M--MQWPP--WLA--KILLL--AWLVLC-----SVAKYCG--KRPLEGQ--LELKNKQKQKTPVLDIC--IAKTS--S--D--H
Lj1g3v4528740.1 210 SMVVRSSVH--LPEE--FGKSTFELAV-M--LQWPP--WLV--KILLL--TWVFLC-----NTNRLCG--KRPSSQG--LELKNMGKTPVLDIC--IAKTS--S--D--H
Lj0g3v0085899.1 215 LMLVRSVH--LPEE--FGTSIYEFAA-M--KKLPP--WMV--KILLL--TRLLLC-----NVEKYCG--KRPISIG--LELKNTRISPPVLDIC--IAKTS--S--D--H
Lj0g3v0147129.1 230 TMVV-----
Lj0g3v0101099.1 211 YVVA--NTVH--LPEE--FGFSSFGVAM-A--YKWP--PKIV--KILL--ASFTLC-----NTNHYCG--KRPKTCG--LELKLATGKTPVLDVCG--IAQTS--S--D--H
Lj1g3v2036560.1 228 SLVARDTVH--LPEE--LGKSTFGLSM-W--LKWPP--RIV--RFLL--SWMLLC-----DTARLCG--DRPQLGQ--LELKNRSKGTPLVDVCG--IAKTS--S--D--H
Lj0g3v0049349.1 230 SLVVRDTH--LPEE--LGKSTFGLSM-W--LKWPP--RFV--QFVL--SDMLLC-----DTAQLCG--HRPKIGQ--LELKNLYGKTPVLDVCG--IAKTS--S--D--H
Lj4g3v3081700.1 249 SLVVRDTH--LPEE--FGKSTFGLSL-S--LKCFF--CLV--KFL--S--SHMLC-----NTAQFCG--DRPKIGQ--LELKDLEGKTPVLDVCG--IAHIS--S--D--H
Lj1g3v4764550.1 196 SIIIRSP--N--SIYIFW-----V-----S--RAF--NAT-----
Lj1g3v4764680.3 198 SIIIRSPVH--FLT--D--M-----YYAG--E--LRY--S--STV--N--L--VMASRIVY-----DLSKYCG--PVPTECG--FTMKMKYKGFPLVDVCG--IAKTS--S--D--H
Lj0g3v0162379.1 199 SIVIRSPVH--HFSFFVQ-----FF-----I--CEV--L--Q--SKTK-----
Lj3g3v3189630.1 198 SIIIRSP--N--VIT--E--I-----H--QGM--R--VKY--P--QV--V--KV--TF--GNLKY-----DLTQFCG--YQPKHGQ--LYAKYLTGKSAVLDVCG--IAKTS--S--D--H
Lj3g3v3189640.1 170 SIIIRSP--N--VIT--E--I-----H--QGM--R--VKY--P--QV--V--KV--TF--GNLKY-----DLTQFCG--YQPKHGQ--LYVKFLTGKSAVLDVCG--IAKTS--S--D--H

```

F

```

Lj1g3v3330000.1 347 M--KK--A--P--FWFCKEG--LVDGEEASTSPLKTFV--L--L--T--G--R--GDKKLLKDMFVSSYFQNLIA--P--NASTPL--YRDCIHPQI--P--Q--AV--G--FAESASNLFTSEIRCRVVA--L--D
Lj6g3v1162950.1 349 IFKR--AS--FWFWNGGVE--D--D-----NTKIDAV--V--L--T--G--D--GKKLKTILPDPFRS--L--LEYPS--GLMPLYRGTIHPLI--P--N--AF--G--YVESVSNLYTSEMRS--W--LAC--L--D
Lj4g3v2215030.1 43 LF--K--T--S--W--FWNGG--E--D--D-----KSKLEA--V--V--L--T--G--D--GKKLKSILPEPFC--S--L--LEYPS--GLMPLYRGTIHPLI--P--N--AF--G--YVESVSNLH--S--ELRS--W--L--S--A--I--D
Lj0g3v0220659.1 257 H--HP--E--D--S--LQEDG--W--V--E--D--D-----SSCILAD--T--L--Y--C--G--Y--S--Y--A--F--P--L--D--T--K--G--M--V--V--V-----D--D--R--V--G--L--Y--E--H--T--E--P--S--L--A--P--S--S--H--G--I--P--R--I--G--I--P--F--F--F--E--S--Q--A--W--I--A--Q--L--S
Lj4g3v1683220.2 261 H--HP--Q--D--N--LQEDG--R--V--E--D--D-----SSIQAD--T--L--Y--C--G--Y--S--Y--V--F--P--L--D--T--K--G--M--V--H--R-----R-----
Lj2g3v2002280.2 260 W--H--S--M--D--S--V--H--E--D--G--K--V--E--D--D-----SSAIAV--C--L--H--C--G--Y--Y--D--F--P--L--E--T--E--G--L--V--T--V-----D--D--N--R--V--G--L--Y--Q--H--V--E--P--A--L--A--P--W--S--F--G--L--P--W--I--P--P--L--C--E--L--Q--S--K--W--I--A--S--L--S
Lj0g3v0115209.3 119 W--F--H--D--M--C--Q-----E--C--C--R--V--S--F--L--V--L--S-----
Lj0g3v0226769.1 -----
Lj0g3v0308259.1 104 K--V--P--G--I--K--R--F--N--N--G--E--L--V--L--N-----S--E--K--H--D--V--D--A--V--L--T--G--Y--S--N--V--P--S--W--L--K--E--G--E--F--F--S-----K--N--G--F--P--K--S-----P--F--E--N--G--W--K--G--N--G--Y--A--G--F--T--K-----G--L--G--S--S--D--A
Lj1g3v4528740.1 299 N--V--P--G--I--K--R--F--N--K--H--E--L--V--L--N-----S--E--K--L--D--I--D--A--V--L--T--G--Y--S--N--V--P--S--W--L--K--E--G--E--F--F--S-----K--N--G--Y--P--K--M-----P--F--E--N--G--W--K--G--K--A--G--Y--A--G--F--T--K-----G--L--G--S--S--D--A
Lj0g3v0085899.1 304 K--V--P--A--G--I--K--R--F--L--P--G--K--V--E--L--V--L-----S--K--V--L--D--I--D--S--V--L--T--G--Y--S--N--V--P--S--W--L--K--E--N--D--E--F--F--S-----H--D--G--I--P--K--D-----P--F--E--N--G--W--K--G--K--N--G--Y--A--G--F--T--R-----G--L--F--A--S--C--I--Y--A
Lj0g3v0147129.1 -----
Lj0g3v0101099.1 300 K--V--M--E--G--V--K--E--I--T--R--N--G--A--K--L--D-----S--Q--E--K--E--F--D--A--V--L--T--G--Y--S--N--V--P--V--L--K--V--K--K--I--V--L-----F--V--L--R--F-----
Lj1g3v2036560.1 317 K--V--R--P--G--I--K--R--L--K--H--H--A--V--E--L--D-----S--R--T--E--N--F--D--A--V--L--T--G--Y--S--N--V--P--Y--L--K--E--N--E--M--F--S--K-----Q--D--G--F--P--K--S-----P--F--E--N--G--W--K--G--E--N--G--Y--A--G--F--T--K-----G--L--G--A--S--D--A
Lj0g3v0049349.1 319 K--V--C--R--G--I--K--R--L--R--N--A--V--E--L--D-----S--K--V--E--S--F--D--A--V--L--T--G--Y--S--N--V--P--S--W--L--K--D--N--E--M--F--S--E-----K--D--G--L--P--R--K-----P--F--E--N--G--W--K--G--S--N--G--Y--A--G--F--T--K-----G--L--G--A--S--D--A
Lj4g3v3081700.1 338 K--V--C--R--G--I--K--L--V--R--Q--H--E--L--V--E--D--D-----S--K--I--E--N--F--D--V--L--T--G--Y--S--N--V--P--S--W--L--K--G--T--D--M--F--C--E-----E--E--G-----F--E--N--G--W--K--G--E--N--G--Y--A--G--F--S--K-----G--L--G--T--S--D--A
Lj1g3v4764550.1 -----
Lj1g3v4764680.3 282 Q--L--P--A--E--H--E--S--I--R--G--N--Q--V--L--E--R--D-----S--K--S--Q--P--F--D--S--I--F--C--T--G--R--R--S--T--K--K--W--L--K--G--D--D--F--L--N-----E--D--G--F--P--K--E-----G--L--E--N--H--W--K--G--N--N--G--Y--C--G--L--S--R-----G--F--F--G--A--N--D--A
Lj0g3v0162379.1 -----
Lj3g3v3189630.1 282 -----K--D--Y--N--Y--I--L--N-----E--Y--G--M--P--K--N-----D--Y--E--N--H--W--K--G--D--H--G--Y--C--G--L--A--R-----G--L--W--G--V--K--D--A
Lj3g3v3189640.1 254 K--V--I--P--S--N--I--G--R--I--E--K--N--K--V--E--A--N-----N--I--E--K--E--F--D--A--V--L--T--G--Y--S--V--A--H--K--W--L--K--D--Y--N--Y--I--L--N-----E--Y--G--K--P--K--N-----D--Y--E--N--H--W--K--G--D--H--E--Y--C--G--L--A--R-----G--L--W--G--L--K--D--A

```

```

Lj1g3v3330000.1 453 G--T--F--Q--V--P--N--I--E--E--K--K--V--K--E--W--E--E--Y--M--K--Y-----S--G--P--Y--T--R--S--C--I--V--G--L--H--I--W--Y--A--D--Q--L--C--K--D--M--G--L--N--P--K--R--K--G-----L--L--A--E--L--F--Q--P--Y--G--L--W--P--F--G--I
Lj6g3v1162950.1 449 G--K--F--K--L--P--N--A--E--K--L--A--Q--I--F--K--M--E--V--M--K--R-----S--T--R--F--W--Q--R--C--V--T--T--W--I--G--H--N--D--E--I--C--K--D--L--G--W--N--A--W--R--K--K--N-----L--V--K--E--A--F--S--P--Y--F--S--G--D--Y--K
Lj4g3v2215030.1 144 N--K--F--K--L--P--D--V--E--S--L--S--H--T--N--K--E--M--E--V--M--K--R-----S--T--R--Y--K--R--K--I--S--T--Y--S--I--N--H--S--D--E--I--C--K--D--M--G--N--S--L--R--K--K--N-----W--I--S--E--A--F--G--P--Y--S--S--A--D--Y--E--N
Lj0g3v0220659.1 354 G--K--K--V--L--P--S--W--E--E--M--K--S--I--K--E--F--Y--H--S--T-----E--L--A--G--I--P--K--K--H--E--T--H--I--A--N-----F--E--Y--C--D--K--Y--G--E--N--V--G--F--P--R--L--E--E--W--R--K--G--L--C--L--S--A--I--N--S--D--V--N--L--E--T--Y--R--D--S--W--D--D--G--E--L--L--Q--E--A--L--Q--S--P--H--F--T--Q--L--G--L
Lj4g3v1683220.2 -----
Lj2g3v2002280.2 357 N--R--I--A--L--P--S--Q--E--E--A--K--D--E--A--F--Y--V--S--L-----E--A--S--G--T--P--K--S--Y--T--H--N--L--A--F-----V--Q--W--D--Y--N--N--I--A--D--Q--C--G--V--A--V--E--E-----
Lj0g3v0115209.3 -----
Lj0g3v0226769.1 -----
Lj0g3v0308259.1 188 I--K-----S--O--D--I--G--Q--V--W--K--E--T--K--Q--R--K--Q--C--T--I--T--A--C--Q--R-----C--I--S--Q--F-----
Lj1g3v4528740.1 383 M--K-----S--O--D--I--G--Q--V--W--K--E--E--T--K--Q--K--Q--N--N--R--A--Y--H--R-----C--I--S--Q--F-----
Lj0g3v0085899.1 389 K--N-----C--R--D--I--A--E--S--W--K--E--E--T--K--Q--N--S--T--G--D--A--N--D--T--P--K--G--L--T--F--T--D--D--A--L--A--A--F--L--V--E--D--D--G--K--K--S--N-----
Lj0g3v0147129.1 -----
Lj0g3v0101099.1 -----
Lj1g3v2036560.1 402 K--K-----I--A--D--I--K--R--C--W--E--G--D--E--A--K--E--I--A--V--F--A-----R--S--I--L--P--Q--S--N-----
Lj0g3v0049349.1 404 K--R-----I--A--E--D--I--E--H--S--W--K--A--V--E--A--R--V--L--D--I--P-----S--P--L--A-----
Lj4g3v3081700.1 418 K--R-----I--A--O--D--I--Q--H--C--W--K--L--S--C-----
Lj1g3v4764550.1 -----
Lj1g3v4764680.3 368 Q--N-----I--A--N--D--I--A--S--L--I--T--Q--Q--E--K--E--L--L--V-----
Lj0g3v0162379.1 -----
Lj3g3v3189630.1 326 E--A-----I--A--E--D--I--T--Q--S--L--K--Q--D--Q-----
Lj3g3v3189640.1 340 E--A-----I--A--E--D--I--T--Q--S--L--K--Q--D--Q-----

```

```

Lj1g3v3330000.1 528 F--S--F--L--I--H--V--G--C--K--T--C--I--T--I--N
Lj6g3v1162950.1 523 E--D-----
Lj4g3v2215030.1 218 E--K--Q--D-----
Lj0g3v0220659.1 453 E--D--S--P--L-----
Lj4g3v1683220.2 -----
Lj2g3v2002280.2 -----
Lj0g3v0115209.3 -----
Lj0g3v0226769.1 -----
Lj0g3v0308259.1 -----
Lj1g3v4528740.1 -----
Lj0g3v0085899.1 -----
Lj0g3v0147129.1 -----
Lj0g3v0101099.1 -----
Lj1g3v2036560.1 -----
Lj0g3v0049349.1 -----
Lj4g3v3081700.1 -----
Lj1g3v4764550.1 -----
Lj1g3v4764680.3 -----
Lj0g3v0162379.1 -----
Lj3g3v3189630.1 -----
Lj3g3v3189640.1 -----

```

Twenty one predicted *L. japonicus* YUCCA-like proteins were aligned with Clustal Omega using the default settings. The BoxShade Server version 3.21 was used to generate the final output. A threshold of  $\geq 50\%$  conservation was used. Black shading specifies identical residues, whereas gray indicates presence of conservative substitutions. Letters A to F denote relative conserved regions present in YUCCA-like flavin monooxygenases (Yan et al., 2016).

**Fig. S8.** Relationship tree between predicted *Lotus japonicus* and *Medicago truncatula* YUCCA-like proteins.

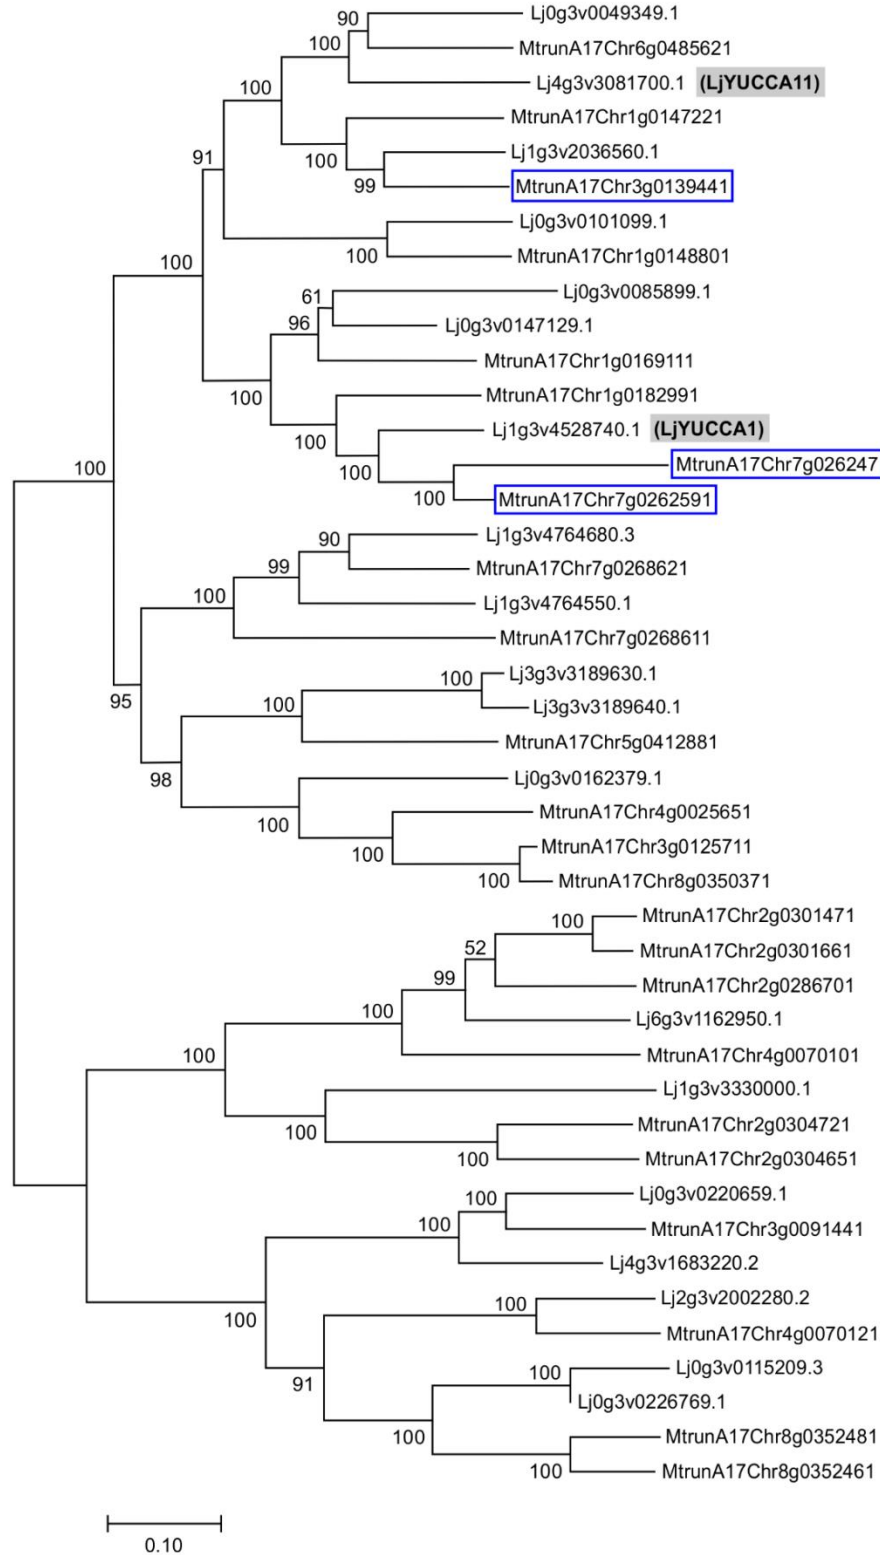

The protein sequences were aligned with ClustalW and the tree was generated using MEGA 7 (Molecular Evolutionary Genetics Analysis) software and neighbor-joining method with bootstrap replicates of 1000. Note that *L. japonicus* Lj0g3v0308259.1 and Lj4g3v2215030.1 and *M. truncatula* MtrunA17Chr3g0129991 and MtrunA17Chr7g0250581 were not included in the tree due to only partially available sequence information. Blue outlines highlight three *M. truncatula* proteins, where the corresponding genes were previously shown to be upregulated in response to rhizobial inoculation or NF application (Larrainzar et al., 2015; Schiessl et al., 2019).

**Figure S9.** *Lotus japonicus* *NF-YAs* function partially redundantly to regulate nodule organogenesis.

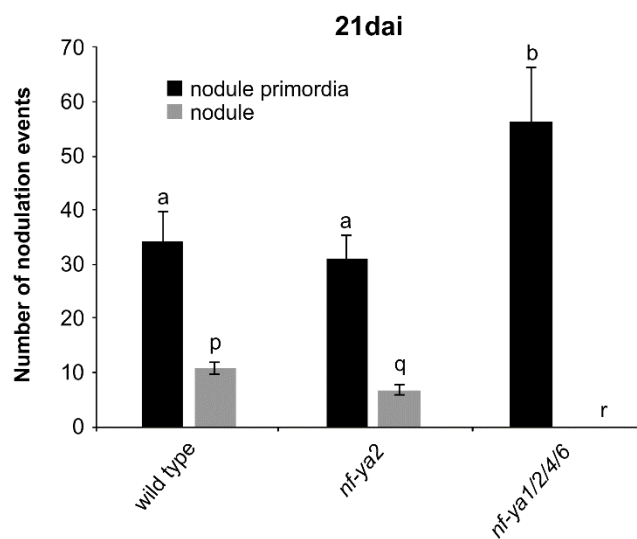

Scores of nodulation events (nodule primordia and nodules) at 21 dai are given. The means  $\pm$  95% confidence intervals are presented for 15 individuals per genotype. Asterisks denote significant differences for a pair-wise comparison (The Student's t-test; \*\*\*  $P < 0.001$ ).

**Table S1. Primers used in this study.**

| Name of primer                                                | Primer sequences (5'-3')             |
|---------------------------------------------------------------|--------------------------------------|
| <b>Genotyping primers for <i>sty3</i> TILLING alleles</b>     |                                      |
| sty3-1-F                                                      | TCTTCTTACAGAGGCTTTGAGATATGGAACCACCGG |
| sty3-1-R                                                      | AGAGTGCAAGCGAGTGATGAA                |
| sty3-9-F                                                      | CGCTAGGTGTTGGGCCGTCG                 |
| sty3-9-R                                                      | ATCTCTCTGCTGCCTTGTAGGAACCAGCT        |
| <b>Sequencing primers for <i>sty3-1</i> and <i>sty3-9</i></b> |                                      |
| sty3-1-seq-F                                                  | ATGGCGGGTTTATTCTCACTAG               |
| sty3-1-seq-R                                                  | TCCTCCTCCACCTCCACTTC                 |
| sty3-1-seq-R1                                                 | AGCAAGTTCTGCACCTCACA                 |
| sty3-9-seq-F                                                  | GAAGTGGAGGTGGAGGAGGA                 |
| sty3-9-seq-R                                                  | TGCACTCTGCAGGATTCTGTT                |
| sty3-9-seq-F1                                                 | TGTGAGGTGCAGAACTTGCT                 |
| sty3-9-seq-R1                                                 | ACACGCAACCGATCTTCCTT                 |
| <b>qRT-PCR Primers for <i>STYs</i></b>                        |                                      |
| STY1-qPCR-F                                                   | ACGCTCTTGTTGAGCACGAT                 |
| STY1-qPCR-R                                                   | CTCCTGTGTCCGCAATCCTT                 |
| STY2-qPCR-F                                                   | GGTACAAACCAAACGACGATG                |
| STY2-qPCR-R                                                   | CTTAACCCTGCTCCTCCAAC                 |
| STY3-qPCR-F                                                   | GGCCAGACGGCAATAGTTACAC               |
| STY3-qPCR-R                                                   | GAGCCGGATACAAGGAAGAAGG               |
| STY4-qPCR-F                                                   | TGGAACCTCAAATGTGCC                   |
| STY4-qPCR-R                                                   | TCAGGACCGTAAACACCGTT                 |
| STY5-qPCR-F                                                   | TGATGATGAGTAGGCGTGGTG                |
| STY5-qPCR-R                                                   | TGTGGTGGAGGATGGAGGATT                |
| STY6-qPCR-F                                                   | ATGGCGGTATTCAGCAGTGTT                |
| STY6-qPCR-R                                                   | ATCATGGCTGTGGATTGTGG                 |
| STY7-qPCR-F                                                   | GAGGATGGGAAGGATGAGTATG               |
| STY7-qPCR-R                                                   | CTCCACCACCAACAGTACCAC                |
| STY8-qPCR-F                                                   | AGGCCAAGACAATGCTCCTA                 |
| STY8-qPCR-R                                                   | GCGTACCAGCCATGAAAGCA                 |
| STY9-qPCR-F                                                   | GTGGCTGATGGTGGTAGTGG                 |
| STY9-qPCR-R                                                   | TTAGTGGCGGTGGAACCTGTG                |
| UBQ-F                                                         | ATGTGCATTTTAAGACAGGG                 |
| UBQ-R                                                         | GAACGTAGAAGATTGCCTGAA                |
| PP2A-F                                                        | GTAAATGCGTCTAAAGATAGGGTCC            |
| PP2A-R                                                        | ACTAGACTGTAGTGCTTGAGAGGC             |
| ATPs-F                                                        | AACACCACTCTCGATCATTCTCTG             |
| ATPs-R                                                        | CAATGTCCGAAGGCCCATGGTG               |



| <b>Genotyping primers for <i>STY3::SRDX</i> transgene</b>              |                         |
|------------------------------------------------------------------------|-------------------------|
| STY3-SRDX-F                                                            | AAGTGAGAGAAGAATGGCGGG   |
| STY3-SRDX-R                                                            | GCCAAGGATGGATTCCTAAGC   |
| <b>qRT-PCR Primers for <i>YUCCAs</i></b>                               |                         |
| YUCCA1-qPCR-F                                                          | GAGTTGGCGGTTATGATGCTG   |
| YUCCA1-qPCR-R                                                          | CAGGGGTTTTTCCCATTGTGTT  |
| YUCCA11-qPCR-F                                                         | ACAGCACGAAGTGGAGTTTG    |
| YUCCA11-qPCR-R                                                         | AAGCAGGCCACGTTTAGAGA    |
| <b><i>YUCCA1</i> and <i>YUCCA11</i> promoter amplification primers</b> |                         |
| pYUCCA1-DT-F                                                           | CACCTCATCCACTGTCTGTAAAG |
| pYUCCA1-DT-R                                                           | TTTGAATTTTGTGTGTGTTATG  |
| pYUCCA11-DT-F                                                          | CACCAATGCAAGACATTGAC    |
| pYUCCA11-DT-R                                                          | ATGAATTGAAAACCAACATATAC |
| <b><i>YUCCA1</i> and <i>YUCCA11</i> promoter sequencing primers</b>    |                         |
| pYUCCA1-F1                                                             | ATAACCTCCGATCCACTTC     |
| pYUCCA1-F2                                                             | TGGAGTGTTATTCTAACA      |
| pYUCCA1-F3                                                             | TACGTGTCAGTATGTCCTGC    |
| pYUCCA1-F4                                                             | ATTTCTTCCATACCACTTG     |
| pYUCCA1-F5                                                             | TCTCACAGAATATAGTGT      |
| pYUCCA1-F6                                                             | TCAATCCAACACTCTCAAC     |
| pYUCCA1-R1                                                             | CAACGATGCAGTGGAGCA      |
| pYUCCA1-R2                                                             | ACATCACAGTCCTCCTCATTC   |
| pYUCCA1-R3                                                             | ATCTATACAGTCTCTCTT      |
| pYUCCA1-R4                                                             | GTATATGCATTTTCCATGCAC   |
| pYUCCA1-R5                                                             | GACAATCCTTTGGTTATGTATG  |
| pYUCCA11-F1                                                            | GTACTAGTGTCGCTACCAGATTG |
| pYUCCA11-F2                                                            | CGTCACATAGTTCTTGTCAGGAG |
| pYUCCA11-F3                                                            | TCAAAGCAAGGAATTTGTGAC   |
| pYUCCA11-F4                                                            | CTATGAGTCATTCAAGCAATA   |
| pYUCCA11-F5                                                            | CAAGTAGTCAGTTGTAGTGTG   |
| pYUCCA11-F6                                                            | CAGTCCTTTCTTGAGGACAGTC  |
| pYUCCA11-R1                                                            | GCATTGCTCGTATTAGGAG     |
| pYUCCA11-R2                                                            | GTGACAGCCTTATATTCGTC    |
| pYUCCA11-R3                                                            | GTGACAGAATCTTAGAGAG     |
| pYUCCA11-R4                                                            | CGAATCATGGATCAGGTACCT   |
| pYUCCA11-R5                                                            | CACACAGACATTGGGAGTCAG   |
| pYUCCA11-R6                                                            | GAGCACACAGCAGGAAGCAATGT |
| pYUCCA11-R7                                                            | CTCGTCACTCAGTGCATGT     |

**Table S2:** Expression of four *Lotus japonicus* *STY* genes is significantly upregulated during early stages of symbiosis.

| Gene name   | Gene ID       | log2FC | P-value   | FDR-value |
|-------------|---------------|--------|-----------|-----------|
| <i>STY1</i> | Lj6g3v0959410 | 2.46   | 4.774E-15 | 3.72E-12  |
| <i>STY2</i> | Lj0g3v0059359 | 2.69   | 7.994E-15 | 5.95E-12  |
| <i>STY3</i> | Lj2g3v1728900 | 2.43   | 2.22E-16  | 2.02E-13  |
| <i>STY4</i> | Lj3g3v0766120 | -0.29  | 0.442     | 0.999     |
| <i>STY5</i> | Lj1g3v2140900 | 0.99   | 0.122     | 0.999     |
| <i>STY6</i> | Lj3g3v3376040 | -0.57  | 0.598     | 0.999     |
| <i>STY7</i> | Lj2g3v3044220 | 1.05   | 3.5E-07   | 6.58E-05  |
| <i>STY8</i> | Lj5g3v0155490 | 1.43   | 0.001     | 0.068     |
| <i>STY9</i> | Lj0g3v0258549 | 0.56   | 0.254     | 0.999     |

The wild-type, un-inoculated roots and roots of the same age collected 4 dai with *M. loti* were analyzed using next-generation RNA sequencing (BioProject ID PRJNA630938; <http://www.ncbi.nlm.nih.gov/bioproject/630938>). Of the nine *L. japonicus* *STY* mRNAs, *STY1*, *STY2*, *STY3*, and *STY7* were found to be significantly (FDR<0.05) upregulated 4 dai with *M. loti* (highlighted in gray). Log2FC: log2 fold change from the corresponding, un-inoculated wild-type roots; P-value: uncorrected p-value; FDR-value: false discovery rate.

**Tables S3.** Analysis of *Medicago truncatula* STY gene expression.

**a**

| Gene name     | MtV5 id              | RNAseq after laser caption of nodule zones |       |       |      |       | Upregulated 48h post inoculation (Larrainzar et al. 2015) | FC Nodule/Root (Roux et al. 2014) |
|---------------|----------------------|--------------------------------------------|-------|-------|------|-------|-----------------------------------------------------------|-----------------------------------|
|               |                      | %FI                                        | %FIID | %FIIP | %IZ  | %ZIII |                                                           |                                   |
| <i>MtSTY2</i> | MtrunA17Chr8g0372461 | 52.7                                       | 19.1  | 5.5   | 11.3 | 11.4  | Yes                                                       | 85.6                              |
| <i>MtSTY3</i> | MtrunA17Chr5g0404781 | 70.9                                       | 16.7  | 5.3   | 5.0  | 2.2   | Yes                                                       | 8                                 |
| <i>MtSTY4</i> | MtrunA17Chr3g0082511 | 19.5                                       | 16.5  | 3.3   | 45.9 | 14.9  | Yes                                                       | 3.84                              |
| <i>MtSTY5</i> | MtrunA17Chr3g0142171 | 100.0                                      | 0.0   | 0.0   | 0.0  | 0.0   | No                                                        | nd in roots                       |
| <i>MtSTY6</i> | MtrunA17Chr4g0035591 | 57.9                                       | 23.3  | 18.8  | 0.0  | 0.0   | No                                                        | 0.82                              |
| <i>MtSTY7</i> | MtrunA17Chr5g0441921 | 68.6                                       | 16.8  | 3.3   | 4.9  | 6.5   | Yes                                                       | 4.22                              |
| <i>MtSTY8</i> | MtrunA17Chr1g0155791 | 94.9                                       | 5.2   | 0.0   | 0.0  | 0.0   | Yes                                                       | 5.08                              |
| <i>MtSTY9</i> | MtrunA17Chr8g0353111 | 5.6                                        | 6.3   | 11.7  | 37.1 | 39.4  | No                                                        | 302.03                            |

**b**

| Gene name     | MtV5 id              | Expression in <i>nf-ya1-1</i> mutant vs wild type |                |               |                 |
|---------------|----------------------|---------------------------------------------------|----------------|---------------|-----------------|
|               |                      | 4dpi (log2FC)                                     | 4dpi (p value) | 10dpi (logFC) | 10dpi (p value) |
| <i>MtSTY2</i> | MtrunA17Chr8g0372461 | 1.61                                              | 4.02E-05       | 0.11          | 5.65E-01        |
| <i>MtSTY3</i> | MtrunA17Chr5g0404781 | 0.66                                              | 3.70E-03       | 0.72          | 2.76E-04        |
| <i>MtSTY4</i> | MtrunA17Chr3g0082511 | 0.90                                              | 8.20E-05       | 0.43          | 5.34E-02        |
| <i>MtSTY5</i> | MtrunA17Chr3g0142171 | nd                                                | nd             | nd            | nd              |
| <i>MtSTY6</i> | MtrunA17Chr4g0035591 | nd                                                | nd             | 0.29          | 3.52E-01        |
| <i>MtSTY7</i> | MtrunA17Chr5g0441921 | 0.81                                              | 1.72E-06       | 0.77          | 1.53E-04        |
| <i>MtSTY8</i> | MtrunA17Chr1g0155791 | 0.99                                              | 1.96E-03       | 0.82          | 7.52E-04        |
| <i>MtSTY9</i> | MtrunA17Chr8g0353111 | 2.25                                              | 3.74E-09       | 1.94          | 3.78E-11        |

(a) Compilation of RNAseq expression data for *M. truncatula* STY genes, as based on Roux et al. (2014) and Larrainzar et al. (2015), is shown. Percentages (%) of RNA reads from five different nodule regions are given. FI, nodule meristematic zone; FIID, nodule meristem distal zone; FIIP, nodule meristem proximal zone; IZ, interzone; ZIII, nitrogen-fixation zone, as in Roux et al. (2014). (b) RNAseq expression analysis, comparing *M. truncatula* wild-type and *Mtnf-ya1-1* transcriptomes 4 and 10 days post inoculation with *Sinorhizobium meliloti*. The Benjamini-Hochberg (BH) procedure was used to calculate the P-value of the false discovery rate. Gray boxes represent the genes for which this P-value is <5%. nd= not detected.

**Table S4.** List of *sty* alleles carrying a LORE1 insertion, as identified from the Lotus Base information portal (<https://lotus.au.dk/>).

| Mutant allele  | Gene ID       | LORE1 Line number |
|----------------|---------------|-------------------|
| <i>sty1-1</i>  | Lj6g3v0959410 | 30052423          |
| <i>sty1-2</i>  | Lj6g3v0959410 | 30032212          |
| <i>sty2-1</i>  | Lj0g3v0059359 | P1687             |
| <i>sty3-10</i> | Lj2g3v1728900 | 30010699          |
| <i>sty4-1</i>  | Lj3g3v0766120 | 30083039          |
| <i>sty4-2</i>  | Lj3g3v0766120 | 30007756          |
| <i>sty5-1</i>  | Lj1g3v2140900 | 30115636          |
| <i>sty5-2</i>  | Lj1g3v2140900 | 30120414          |
| <i>sty5-3</i>  | Lj1g3v2140900 | 30089004          |
| <i>sty6-1</i>  | Lj3g3v3376040 | 30136178          |
| <i>sty7-1</i>  | Lj2g3v3044220 | 30060832          |
| <i>sty7-2</i>  | Lj2g3v3044220 | 30074305          |
| <i>sty7-3</i>  | Lj2g3v3044220 | 30084924          |
| <i>sty7-4</i>  | Lj2g3v3044220 | 30092737          |
| <i>sty7-5</i>  | Lj2g3v3044220 | 30097763          |
| <i>sty8-1</i>  | Lj5g3v0155490 | 30088537          |
| <i>sty8-2</i>  | Lj5g3v0155490 | 30089290          |
| <i>sty8-3</i>  | Lj5g3v0155490 | 30109651          |
| <i>sty9-1</i>  | Lj0g3v0258549 | 30034946          |
| <i>sty9-2</i>  | Lj0g3v0258549 | 30109475          |
| <i>sty9-3</i>  | Lj0g3v0258549 | 30058721          |

**Table S5.** Segregation of the *proNF-YA1:STY3::SRDX* transgene in T1 populations, *STY3::SRDX5* and *STY3::SRDX6*, derived from two independent T0 plants.

**a**

| Transgenic T0 Plants | Total T1 plants | <i>pNF-YA1:STY3::SRDX</i> <sup>-</sup> |                  | <i>pNF-YA1:STY3::SRDX</i> <sup>+</sup> |                  |
|----------------------|-----------------|----------------------------------------|------------------|----------------------------------------|------------------|
|                      |                 | Nod <sup>+</sup>                       | Nod <sup>-</sup> | Nod <sup>+</sup>                       | Nod <sup>-</sup> |
| <i>STY3::SRDX5</i>   | 85              | 23                                     | 0                | 0                                      | 62               |
| <i>STY3::SRDX6</i>   | 72              | 21                                     | 0                | 0                                      | 51               |

**b**

| <i>STY3::SRDX5</i>           | <i>pNF-YA1:STY3::SRDX</i> <sup>-</sup> | <i>pNF-YA1:STY3::SRDX</i> <sup>+</sup> |
|------------------------------|----------------------------------------|----------------------------------------|
| Observed no. (O)             | 23                                     | 62                                     |
| Expected no. (E)             | 21.25                                  | 63.75                                  |
| $\chi^2$ calculated          | 0.192156863                            |                                        |
| $\chi^2$ critical (P = 0.05) | 3.841                                  |                                        |

| <i>STY3::SRDX6</i>           | <i>pNF-YA1:STY3::SRDX</i> <sup>-</sup> | <i>pNF-YA1:STY3::SRDX</i> <sup>+</sup> |
|------------------------------|----------------------------------------|----------------------------------------|
| Observed no. (O)             | 21                                     | 51                                     |
| Expected no. E               | 18                                     | 54                                     |
| $\chi^2$ calculated          | 0.666666667                            |                                        |
| $\chi^2$ critical (P = 0.05) | 3.841                                  |                                        |

(a) Number of plants segregating the *pNF-YA1:STY3::SRDX* transgene and the corresponding nodulation phenotypes. (+/-) symbols denote presence and absence of the transgene and nodules (Nod), respectively. (b) The corresponding Chi-square ( $\chi^2$ ) test results for segregation of the transgene in the two T1 populations (P = 0.05).

**Table S6.** *YUCCA11* is regulated upon *Mesorhizobium loti* inoculation.

| Gene ID                        | log2F | P-value | FDR-value |
|--------------------------------|-------|---------|-----------|
| Lj1g3v4528740.1<br>(LjYUCCA1)  | 0.67  | 0.0036  | 0.16      |
| Lj0g3v0049349.1                | 0.26  | 0.4651  | 0.1       |
| Lj0g3v0085899.1                | -0.44 | 0.0295  | 0.64      |
| Lj0g3v0308259.1                | 0.07  | 0.8036  | 0.1       |
| Lj3g3v3189630.1                | nd    | nd      | nd        |
| Lj3g3v3189640.1                | nd    | nd      | nd        |
| Lj1g3v2036560.1                | -0.76 | 0.0070  | 0.25      |
| Lj1g3v4764550.1                | -0.09 | 0.7478  | 0.1       |
| Lj1g3v4764680.3                | 0.01  | 0.9679  | 0.1       |
| Lj0g3v0101099.1                | 3.18  | 0.0946  | 0.1       |
| Lj4g3v3081700.1<br>(LjYUCCA11) | 8.31  | 0.0006  | 0.04      |
| Lj0g3v0115209.3                | 0.23  | 0.2437  | 0.1       |
| Lj0g3v0147129.1                | 0.57  | 0.6486  | 0.1       |
| Lj0g3v0162379.1                | nd    | nd      | nd        |
| Lj0g3v0220659.1                | -0.01 | 0.9649  | 0.1       |
| Lj0g3v0226769.1                | 0.13  | 0.6178  | 0.1       |
| Lj1g3v3330000.1                | -1.15 | 0.0712  | 0.1       |
| Lj2g3v2002280.2                | -0.42 | 0.1837  | 0.1       |
| Lj4g3v1683220.2                | -0.20 | 0.3290  | 0.1       |
| Lj4g3v2215030.1                | 0.03  | 0.9320  | 0.1       |
| Lj6g3v1162950.1                | -0.15 | 0.2437  | 0.1       |

Wild-type, un-inoculated roots and those of the same age collected 4 dai with *M. loti*, were analyzed using next-generation RNA sequencing (BioProject ID PRJNA630938; <http://www.ncbi.nlm.nih.gov/bioproject/630938>). Of the 21 *YUCCA*-like genes, only *YUCCA11* was found to be significantly (FDR<0.05) regulated by *M. loti* inoculation (highlighted in yellow) Log2FC: log2 fold change; P-value: uncorrected P-value; FDR-value: false discovery rate (corrected P value), nd= not detected.

**Table S7.** A list of mutant *nf-ya* alleles used in this study. Note that information about the corresponding LORE1 insertion lines can be found at Lotus Base (<https://lotus.au.dk/>).

| Mutant allele   | Gene ID       | LORE1 line number | Remarks                           |
|-----------------|---------------|-------------------|-----------------------------------|
| <i>nf-ya1-2</i> | Lj5g3v0841080 | N/A               | EMS mutant (Hossain et al., 2016) |
| <i>nf-ya2</i>   | Lj6g3v0647470 | 30162806          | Insertion in the first exon       |
| <i>nf-ya4</i>   | Lj1g3v4752710 | 30092825          | Insertion in the first exon       |
| <i>nf-ya6</i>   | Lj3g3v0338970 | 30065649          | Insertion in the third exon       |

**Table S8.** Levels of *NF-YA* mRNAs in 11 day-old un-inoculated *Lotus japonicus* roots.

| Gene name       | Gene ID       | Average TPM |
|-----------------|---------------|-------------|
| <i>LjNF-YA1</i> | Lj5g3v0841080 | 0.5         |
| <i>LjNF-YA2</i> | Lj6g3v0647470 | 27.8        |
| <i>LjNF-YA3</i> | Lj4g3v2179250 | 3.3         |
| <i>LjNF-YA4</i> | Lj1g3v4752710 | 89.7        |
| <i>LjNF-YA5</i> | Lj3g3v2657800 | 12.1        |
| <i>LjNF-YA6</i> | Lj3g3v0338970 | 18.2        |
| <i>LjNF-YA7</i> | Lj2g3v3336090 | 11.6        |
| <i>LjNF-YA8</i> | Lj0g3v0252369 | 6.4         |

TPM: transcripts per million, as determined using 11day-old un-inoculated roots (BioProject ID PRJNA630938; <http://www.ncbi.nlm.nih.gov/bioproject/630938>).



## References

- Perry J, Brachmann A, Welham T, Binder A, Charpentier M, Groth M, Haage K, Markmann K, Wang TL, Parniske M. 2009.** TILLING in *Lotus japonicus* identified large allelic series for symbiosis genes and revealed a bias in functionally defective ethyl methanesulfonate alleles toward glycine replacements. *Plant Physiology* **151**: 1281-1291.
- Yan S, Che G, Ding L, Chen Z, Liu X, Wang H, Zhao W, Ning K, Zhao J, Tesfamichael K, et al. 2016.** Different cucumber *CsYUC* genes regulate response to abiotic stresses and flower development. *Scientific Reports* **6**: 20760.
- Roux B, Rodde N, Jardinaud MF, Timmers T, Sauviac L, Cottret L, Carrere S, Sallet E, Courcelle E, Moreau S, et al. 2014.** An integrated analysis of plant and bacterial gene expression in symbiotic root nodules using laser-capture microdissection coupled to RNA sequencing. *Plant Journal* **77**: 817-837.
- Larrainzar E, Riely BK, Kim SC, Carrasquilla-Garcia N, Yu HJ, Hwang HJ, Oh M, Kim GB, Surendrarao AK, Chasman D, et al. 2015.** Deep sequencing of the *Medicago truncatula* root transcriptome reveals a massive and early interaction between nodulation factor and ethylene signals. *Plant Physiology* **169**: 233-265.
- Schiessl K, Lilley JLS, Lee T, Tamvakis I, Kohlen W, Bailey PC, Thomas A, Luptak J, Ramakrishnan K, Carpenter MD, et al. 2019.** NODULE INCEPTION recruits the lateral root developmental program for symbiotic nodule organogenesis in *Medicago truncatula*. *Current Biology* **29**: 3657-3668 e3655.
